# Supplementary material for: Na4PMo11VO40-catalyzed one-pot oxidative esterification of benzaldehyde with hydrogen peroxide
Source: Royal Society of Chemistry journal article supplement (doi:10.1039/d1ra06718d), 2021-01-01
Supplement: d1ra06718d1.pdf [file d1ra06718d1.pdf]

# **Na<sub>4</sub>PMo<sub>11</sub>VO<sub>40</sub>-catalyzed one-pot oxidative esterification of benzaldehyde with hydrogen peroxide**

CASTELO BANDANE VILANCULO\*<sup>1</sup> MÁRCIO JOSÉ DA SILVA<sup>2</sup>

<sup>1</sup>*Chemistry Department, Pedagogic University of Mozambique, FCNM, Campus of Lhanguene, Av. de Moçambique, Km 1, Maputo, zip-code: 4040*

<sup>2</sup>*Chemistry Department, Federal University of Viçosa, Viçosa, Minas Gerais, Brasil. zip-code: 36590-000*

## **Supplemental material**

List of Figures

**Figure 1SM.** FT-IR spectra of Sodium phosphomolybdate salts unsubstituted and Vanadium substituted.

**Fig. 2SM** Powder XRD of Vanadium (mono, di-, or tri)-substituted Sodium phosphomolybdate salts

**Fig. 3SM.** Potentiometric titration curves with n-butylamine of undoped and Vanadium-doped sodium phosphomolybdate salts

**Figure 4SM.** Scanning electronic microscopy images of Na<sub>3</sub>PMo<sub>12</sub>O<sub>40</sub> (a), Na<sub>4</sub>PMo<sub>11</sub>V<sub>1</sub>O<sub>40</sub> (b), Na<sub>5</sub>PMo<sub>10</sub>V<sub>2</sub>O<sub>40</sub>, and Na<sub>6</sub>PMo<sub>9</sub>V<sub>3</sub>O<sub>40</sub> (d)

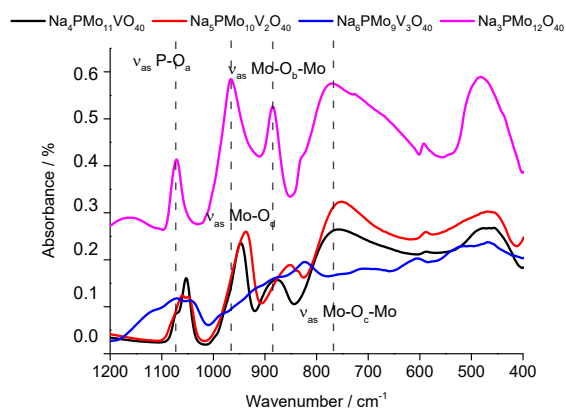

**Figure 1SM.** FT-IR/ATR spectra of undoped and doped-Vanadium phosphomolybdic salts

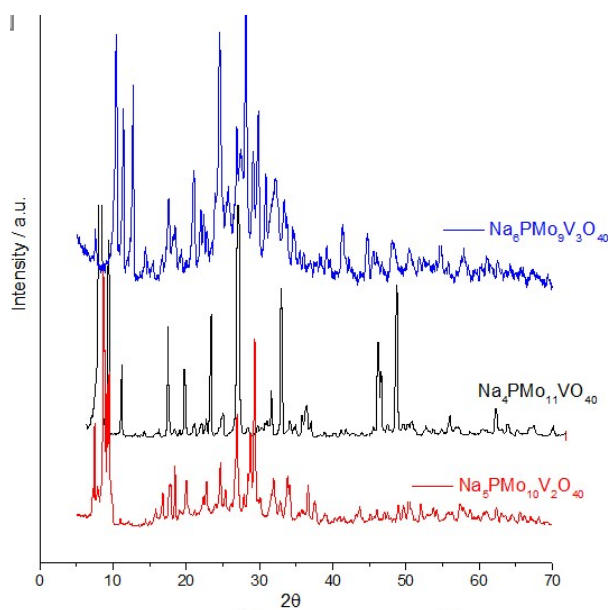

**Fig. 2SM** Powder XRD of Vanadium (mono, di-, or tri)-substituted Sodium phosphomolybdate salts

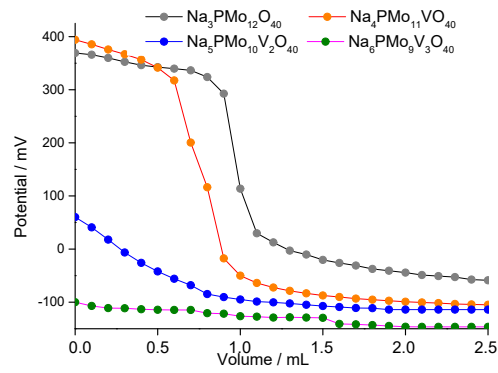

**Fig. 3SM.** Potentiometric titration curves with n-butylamine of Undoped and Vanadium-doped sodium phosphomolybdate salts

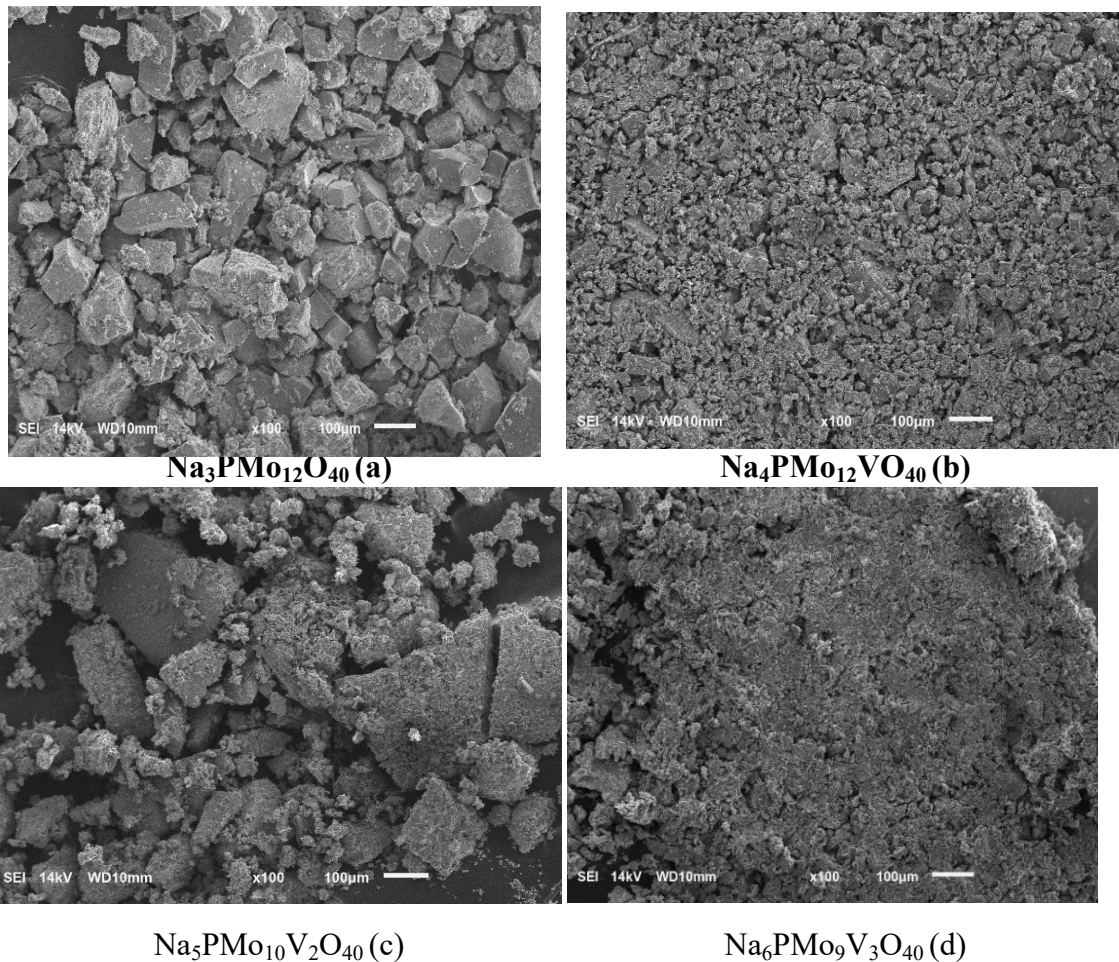

**Figure 4SM.** Scanning electron microscopy images of  $\text{Na}_3\text{PMo}_{12}\text{O}_{40}$  (a),  $\text{Na}_4\text{PMo}_{11}\text{VO}_{40}$  (b),  $\text{Na}_5\text{PMo}_{10}\text{V}_2\text{O}_{40}$  (c), and  $\text{Na}_6\text{PMo}_9\text{V}_3\text{O}_{40}$  (d)
